# Supplementary material for: Functional Characterization of a Sugar Beet BvbHLH93 Transcription Factor in Salt Stress Tolerance
Source: PubMed Central journal article supplement (PMC8037259; doi:10.3390/ijms22073669), 2021-04-01
Supplement: ijms-22-03669-s001.pdf [file ijms-22-03669-s001.pdf]

```

1   TCCACTATATTAGAATCAGAAGATTCATGAAAGAATTAGTTTTATTGTTAGCTTGTGTTAGGGTTTCTTCAACCTGTATATTGTAACACG
91  CCTTATATGATTCAATTCCTTTTGTGTTTATCTCTGGTCCTCCCTAATCCCTTACCTACAATTATATAAAAAACATTGATTATATGACTT
1   M S N P P F G S P L Y N E E D D F S F P F Q L P N N D
181 TTTGGTTTTATGTCTAACCCCTCCTTTGGAAATCCCTCTATAATGAGGAAGATGACTTCTCTTTCCCTTTTCAACTACCAAATAATGAT
28  D P I N F P P L I E D H N S L P S T S S L P M S E Y Q D L S
271 GATCCCATCAATTTCCACCTCTTATTGAAGATCATAATCTTTGCCCTCTACATCTTCACTACCCATGTCAGAGTACCAAGATTAAGC
58  M F I D D H H E E D H T L I G Q Y N P N I Q E T I N W A C P
361 ATGTTTATTGATGATCATCATGAAGAAGATCATACTAATAGGGCAATATAATCCCAACATACAAGAGACAATAAATGGGCATGTCCA
88  I E Q V G L N Q V H Q G A I E G S S I G Y H E M Q M Q Y Y C
451 ATTGAACAGGTGGTCTTAATCAGGTGCACCAGGTGCAATAGAAGGCTCATCTATAGGATATCATGAGATGCAAATGCAATACACTACTGT
118 P T T T T T T T T T I A V A A S A A T M M I N D Q A A P P P G
541 CCTACCACCACCACCACAACCACCATCGTGTGCTGCTCCGCCGCCACCATGATGATTAATGATCAAGCTGCTCCACCACCTGGT
148 V C R G G G G G E G S S S K K L D H N A K E K V R R M K L N
631 GTTTGTCTGGTGGCGGCGGTGGTGAAGGATCGTCTAGCAAGAACTTGATCATTAATGCTAAGGAGAAAAGTTAGGAGGATGAAGCTTAAT
178 E T Y L A F R S L L P D S K R A K K R W S A P Y I I D R A L
721 GAAACATAATTTGGCTTTTCGCTCCTTGCTACCAGATTCTAAAAGAGCTAAGAAAAGATGGAGTGCACCATATATAATGATAGAGCCTTG
208 D Y I P Q L Q A E I E K L T L E K K N M L T M L E K K Q Q L
811 GATTACATCCCTCAGCTTCAAGCTGAGATAGAGAAGCTAACACTCGAGAAGAAGAATGCTAACAATGCTAGAGAAAAAGCAGCAACTC
238 V E R S K D H N N A T E D K K T L T V S M N E V K I G E V I
901 GTTGAACGTAGCAAGGATCATAATAATGCAACTGAAGATAAGAAGACGCTAACAGTATCGATGAATGAAGTAAAAATGGTGAAGTGATA
268 V Q I C E Q N N K I G M L P T L I E K L E G E S M Q I V G A
991 GTCCAGATTTGTGAACAGAATAACAAAATGGTATGTTACTACGTTGATCGAAAACTCGAAGGAGAAAAGCATGCAATCGTAGGTGCC
298 S S Q R A C E D R S C F H I H V Q M G E N P V E A D Y V A I
1081 TCTTCACAACGTGCATGTGAAGATAGATCCTGCTTCCATAATCATGTTCAAATGGGTGAAAACCCAGTGAAGCTGATTATGTTGCAATT
328 L H K K I I S W L S *
1171 TTACATAAGAAGATAATCTCTTGGCTGTCTTAGTACGGAGAAGATCAGTGTACTCCGACACCTTCATTTACATTGTTTCAACAATGGGG
1261 TGCCTGTCGGTCCGACATGACACTTTACTTGAATCTCATTTCAAATAAAAACTTGACTTTTTCTACAAAATAGTCGAGTCGGAC
1351 ACTTGGACACCCGTATTCGAGTAAACACTCAATCCGTGCTAAAGTAAACATAGGAGAAAATGTTTCATAGGAAAACTAATATGAGCTTCT
1441 TTGAATATGAAATGAAATCTCCTCTTACTTTTCTGTAGAGAAGTAGAAATACAGCGTGCCTTCAATTTTCATGGA

```

 Basic
  helix
  loop

**Figure S1.** Sequence analysis of a cDNA encoding a *BvbHLH93* isolated from the sugar beet. Nucleotide and deduced amino acid sequence of the *BvbHLH93*.

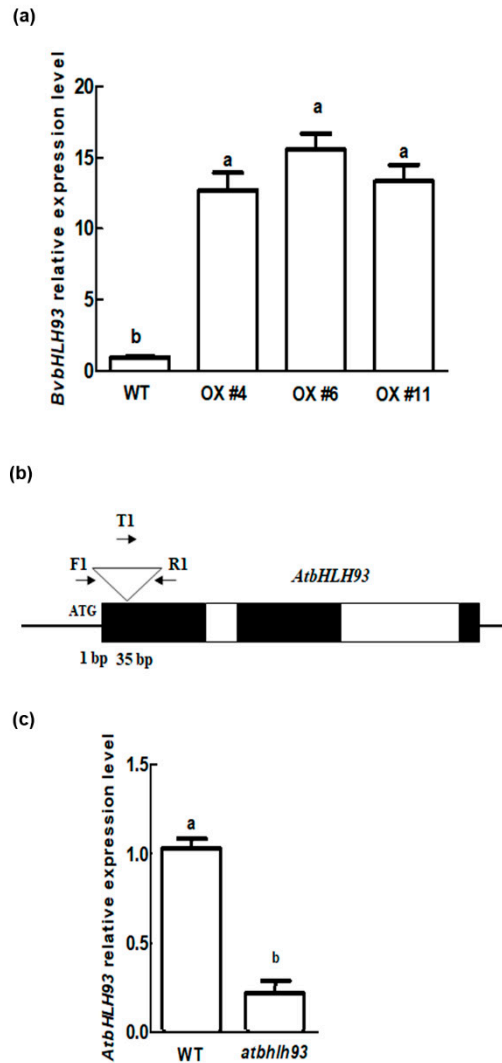

**Figure S2.** Identification of *atbhlh93* mutant and overexpression of *BvbHLH93* in *Arabidopsis*. (a) QRT-PCR analysis of the expression levels of the overexpressed *BvbHLH93* (OX4, OX6 and OX11) in *Arabidopsis*; (b) Structure of the *AtbHLH93* gene. The T-DNA insertion site was at 35 bp downstream of the start codon. The primers used to identify the T-DNA insertion were marked with arrows (T1, R1 and F1); (c) Real-time PCR analysis of the expression levels of *AtbHLH93* in the *atbhlh93* mutant. Different letters indicate significant difference at  $p < 0.05$ . Three biological replicates were performed. Please refer to supplementary materials for the primers used.

**Table S1.** The list of primers used in this article

| Primer name                                         | Primer sequence                         |
|-----------------------------------------------------|-----------------------------------------|
| <i>BvbHLH93-F</i> (Full length cDNA)                | 5-TCCACTATATTAGAATCAGAAGATT-3           |
| <i>BvbHLH93-R</i> (Full length cDNA)                | 5-TCCATGAAAATTGAAGGCACGCTGT-3           |
| <i>BvbHLH93-F</i> (GFP vector construct)            | 5-CCGGAATTCATGTCTAACCCCTCTTTTGG-3       |
| <i>BvbHLH93-R</i> (GFP vector construct)            | 5-ACGCGTCGACAGCCAAGAGATTATCTTC-3        |
| <i>BvbHLH93-F</i> (Yeast vector construct)          | 5-GAATCCCGGGGATCATGTCTAACCCCTTTTGG-3    |
| <i>BvbHLH93-R</i> (Yeast vector construct)          | 5-GCAGGTCGACGGATCCTAAGACAGCCAAGAGATTA-3 |
| <i>BvbHLH93-F</i> (Overexpression vector construct) | 5-CTAGTCTAGAATGTCTAACCCCTCTTTTGG-3      |
| <i>BvbHLH93-R</i> (Overexpression vector construct) | 5-ACGCGTCGACAGACAGCCAAGAGTCGAC-3        |
| <i>BvbHLH93-F</i> (QRT-PCR)                         | 5- AAGCAGCAACTCGTTGAACG-3               |
| <i>BvbHLH93-R</i> (QRT-PCR)                         | 5- CATGCACGTTGTGAAGAGCC-3               |
| <i>Bv18S rRNA-F</i> (QRT-PCR)                       | 5-CCCCAATGGATCCTCGTTA-3                 |
| <i>Bv18S rRNA-R</i> (QRT-PCR)                       | 5-TGACGGAGAATTAGGGTTCG-3                |
| <i>AtRbohD (At5g47910)-F</i> (QRT-PCR)              | 5-TCAGGGACGACTCGGTGG-3                  |
| <i>AtRbohD (At5g47910)-R</i> (QRT-PCR)              | 5-GTTTATCGAAACGTTGGTC-3                 |
| <i>AtRbohF (At1g64060)-F</i> (QRT-PCR)              | 5-GTTCGATGCATTGAGTAG-3                  |
| <i>AtRbohF (At1g64060)-R</i> (QRT-PCR)              | 5-TTTAATCTTGATAGCTTATT-3                |
| <i>AtbHLH93 (At1g71200)-F</i> (QRT-PCR)             | 5-TGGCTCAAGTAGTGGTGCAG-3                |
| <i>AtbHLH93 (At1g71200)-R</i> (QRT-PCR)             | 5-CCCCCAATTCAAGAACCGAGA-3               |
| <i>β-Actin (At3g53750)-F</i> (QRT-PCR)              | 5- GAGGCTCCTCTTAACCCAA-3                |
| <i>β-Actin (At3g53750)-R</i> (QRT-PCR)              | 5-TACAATTTCCCGCTCTGC-3                  |
| <i>SOD (At5g18100)-F</i> (QRT-PCR)                  | 5-AACGAGGAAGAGCGTCATG-3                 |
| <i>SOD (At5g18100)-R</i> (QRT-PCR)                  | 5-GCGTTTCCAGTTGATTTG-3                  |
| <i>SOD (At4g25100)-F</i> (QRT-PCR)                  | 5-ATGAGAAGTTCTATGAAGAG-3                |
| <i>SOD (At4g25100)-R</i> (QRT-PCR)                  | 5-GTCTTTATGTAATCTGGT-3                  |
| <i>POD (At1g14550)-F</i> (QRT-PCR)                  | 5-CCATAGGACAATCTCAATGC-3                |
| <i>POD (At1g14550)-R</i> (QRT-PCR)                  | 5-TGATCGGTTACTAATAG-3                   |

*POD (At5g66390)-F* (QRT-PCR)

5-CTCACTAAGTTCAAGCGTC-3

*POD (At5g66390)-R* (QRT-PCR)

5-GAATAGGGTCTGGTCACC-3

---
